# Supplementary material for: Comparison of the Effect of Landmark-Based Midline and Paramedian Approaches on Spinal Anesthesia-Related Complications in Adult Patients: A Meta-Analysis of Randomized Controlled Trials
Source: MDPI journal article supplement (doi:10.3390/medicina60010178), 2024-01-19
Supplement: s1 [file s1]

## Supplementary Files

Supplementary Table S1. Search strategy for each database. (20221219)

| Database       | Order | Keywords                                                                                                                      | Results |
|----------------|-------|-------------------------------------------------------------------------------------------------------------------------------|---------|
| PubMed         | #1    | (((((median[Title]) OR (midline[Title])) OR (para-median[Title])) OR (paramedian[Title])) OR (lateral[Title]))                | 83576   |
|                | #2    | (((((spinal[Title]) OR (intrathecal[Title])) OR (intra-the-cal[Title])) OR (sub-arachnoid[Title])) OR (subarachnoid[Title]))  | 167198  |
|                | #3    | ((anesthesia[Title]) OR (anaesthesia[Title])) OR (block[Title])                                                               | 153241  |
|                | #4    | #1 AND #2                                                                                                                     | 1506    |
|                | #5    | #3 AND #4                                                                                                                     | 99      |
| EMBASE         | #1    | median:ti OR midline:ti OR 'para median':ti OR paramedian:ti OR lateral:ti                                                    | 97514   |
|                | #2    | spinal:ti OR intrathecal:ti OR 'intra thecal':ti OR 'sub arachnoid':ti OR subarachnoid:ti                                     | 206120  |
|                | #3    | anesthesia:ti OR anaesthesia:ti OR block:ti                                                                                   | 185487  |
|                | #4    | #1 AND #2                                                                                                                     | 1761    |
|                | #5    | #3 AND #4                                                                                                                     | 124     |
| CENTRAL        | #1    | (median):ti OR (midline):ti OR (para-median):ti OR (paramedian):ti OR (lateral):ti                                            | 5264    |
|                | #2    | (spinal):ti OR (intrathecal):ti OR (intra-the-cal):ti OR (subarachnoid):ti OR (sub-arachnoid):ti                              | 17373   |
|                | #3    | (anesthesia):ti OR (anaesthesia):ti OR (block):ti                                                                             | 38331   |
|                | #4    | #1 AND #2                                                                                                                     | 181     |
|                | #5    | #3 AND #4                                                                                                                     | 130     |
| SCOPUS         | #1    | ( TITLE ( median ) OR TITLE ( midline ) OR TITLE ( para-median ) OR TITLE ( paramedian ) OR TITLE ( lateral ) )               | 139599  |
|                | #2    | ( TITLE ( spinal ) OR TITLE ( intrathecal ) OR TITLE ( intra-the-cal ) OR TITLE ( subarachnoid ) OR TITLE ( sub-arachnoid ) ) | 191984  |
|                | #3    | ( TITLE ( anesthesia ) OR TITLE ( anaesthesia ) OR TITLE ( block ) )                                                          | 305141  |
|                | #4    | #1 AND #2                                                                                                                     | 1635    |
|                | #5    | #3 AND #4                                                                                                                     | 117     |
| Web of Science | #1    | median (Title) or midline (Title) or para-median (Title) or paramedian (Title) or lateral (Title)                             | 124197  |
|                | #2    | spinal (Title) or intrathecal (Title) or intra-the-cal (Title) or subarachnoid (Title) or sub-arachnoid (Title)               | 180611  |
|                | #3    | anesthesia (Title) or anaesthesia (Title) or block (Title)                                                                    | 284865  |
|                | #4    | #1 AND #2                                                                                                                     | 1566    |
|                | #5    | #3 AND #4                                                                                                                     | 94      |

Supplementary Table S2 Level of Certainty for each outcome

| No. of studies | Study design      | Risk of bias | Certainty assessment |              |             |                      | No. of patients     |                 | Effect                           |                                                             | Certainty        |
|----------------|-------------------|--------------|----------------------|--------------|-------------|----------------------|---------------------|-----------------|----------------------------------|-------------------------------------------------------------|------------------|
|                |                   |              | Inconsistency        | Indirectness | Imprecision | Other considerations | Paramedian approach | Median approach | Relative (95% CI)                | Absolute (95% CI)                                           |                  |
| 10             | randomised trials | not serious  | not serious          | not serious  | not serious | none                 | 52/878 (5.9%)       | 93/878 (10.6%)  | <b>OR 0.43</b><br>(0.22 to 0.83) | <b>57 fewer per 1,000</b><br>(from 81 fewer to 15 fewer)    | ⊕⊕⊕⊕<br>High     |
| 6              | randomised trials | not serious  | not serious          | not serious  | not serious | none                 | 63/300 (21.0%)      | 126/300 (42.0%) | <b>OR 0.27</b><br>(0.16 to 0.44) | <b>256 fewer per 1,000</b><br>(from 316 fewer to 178 fewer) | ⊕⊕⊕⊕<br>High     |
| 7              | randomised trials | serious      | not serious          | not serious  | not serious | none                 | 391/445 (87.9%)     | 365/463 (78.8%) | <b>OR 2.30</b><br>(1.36 to 3.87) | <b>107 more per 1,000</b><br>(from 47 more to 147 more)     | ⊕⊕⊕○<br>Moderate |

The level of evidence was assessed by the GRADE method, from very low ⊕⊕⊕⊕ to high ⊕⊕⊕⊕. No.: number; CI: confidence interval; OR: odds ratio.
